# Supplementary material for: Construction of efficient dual activating ratiometric YVO4:Nd3+/Eu3+ nanothermometers using co-doped and mixed phosphors
Source: Royal Society of Chemistry journal article supplement (doi:10.1039/c9nr08358h), 2020-01-01
Supplement: c9nr08358h1.pdf [file c9nr08358h1.pdf]

**Constructing of efficient dual activating ratiometric  $\text{YVO}_4:\text{Nd}^{3+}/\text{Eu}^{3+}$  nanothermometer: co-doping or mixture**

Ilya E. Kolesnikov<sup>a,b,\*</sup>, Daria V. Mamonova<sup>a</sup>, Alexey A. Kalinichev<sup>a</sup>, Mikhail A. Kurochkin<sup>a</sup>, Vasiliy A. Medvedev<sup>a</sup>, Evgenii Yu. Kolesnikov<sup>c</sup>, Erkki Lähderanta<sup>b</sup>, Alina A. Manshina<sup>a</sup>

<sup>a</sup> *St. Petersburg State University, Universitetskaya nab. 7-9, 199034, St. Petersburg, Russia*

<sup>b</sup> *LUT University, Skinnarilankatu 34, 53850, Lappeenranta, Finland*

<sup>c</sup> *Volga State University of Technology, Lenin sqr. 3, 424000, Yoshkar-Ola, Russia*

Contact information

e-mail address: [ie.kolesnikov@gmail.com](mailto:ie.kolesnikov@gmail.com) (I. Kolesnikov)

The prolonged temperature measurements were carried out at room temperature upon 590 nm diode excitation. Thermal sensing was performed using two independent techniques: luminescence thermometry and thermocouple. As can be seen from Figure S1, continuous excitation of  $\text{YVO}_4:\text{Nd}^{3+}/\text{Eu}^{3+}$  NPs with used diode does not cause raising of the observed temperature.

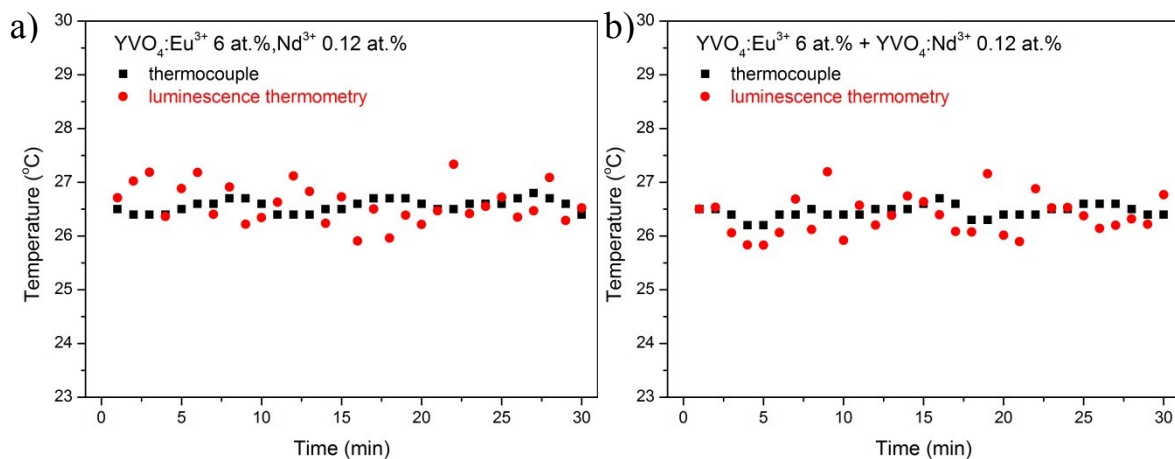

**Figure S1.** Evolution of a) co-doped and b) mixed  $\text{YVO}_4:\text{Nd}^{3+}/\text{Eu}^{3+}$  samples temperature measured with luminescence thermometry and thermocouple.
